# Supplementary material for: Magnetic solid phase extraction coupled with in situ derivatization for the highly sensitive determination of acidic phytohormones in rice leaves by UPLC-MS/MS
Source: Royal Society of Chemistry journal article supplement (doi:10.1039/c4an01186d), 2014-07-29
Supplement: c4an01186d1.pdf [file c4an01186d1.pdf]

1 Supporting Information

2 for

3 **“Magnetic Solid Phase Extraction Coupled with *in-situ* Derivatization**  
4 **for Highly Sensitive Analysis of Acidic Phytohormones in Rice Leaves**  
5 **by UPLC-MS/MS”**

6  
7 Jiu-Feng Liu, Jun Ding, Bi-Feng Yuan, Yu-Qi Feng\*

8  
9 Key Laboratory of Analytical Chemistry for Biology and Medicine (Ministry of Education),

10 Department of Chemistry, Wuhan University, Wuhan 430072, P.R. China.

11 \*Corresponding author: Yu-Qi Feng, Department of Chemistry, Wuhan University, Wuhan  
12 430072, P.R. China. Tel: +86-27-68755595; Fax: +86-27-68755595; E-mail:  
13 yqfeng@whu.edu.cn

14

15

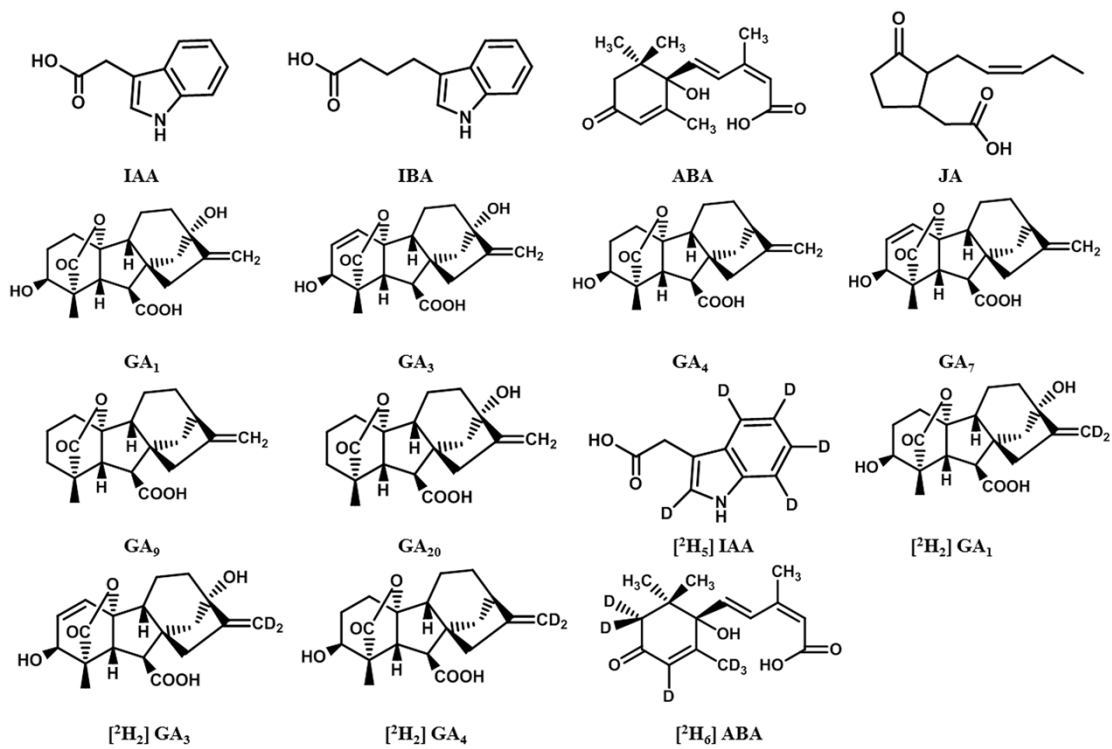

17

18 **Figure S1.** Chemical structures of ten acidic phytohormones and five internal standards.

20 **Table S1.** MRM parameters of 15 acidic phytohormones and IS in UPLC-ESI-MS/MS.

| Analytes                                        | Scan mode | Precursor ion (m/z) | Product ion (m/z) <sup>a</sup> | Q1 pre bias (V) | CE (V)  | Q3 pre bias (V) |
|-------------------------------------------------|-----------|---------------------|--------------------------------|-----------------|---------|-----------------|
| GA <sub>1</sub>                                 | -         | 347.3               | <b>229.1</b> /273.2            | 16/13           | 37/35   | 23/15           |
| GA <sub>3</sub>                                 | -         | 345.3               | <b>143.1</b> /--               | 16/--           | 29/--   | 25/--           |
| GA <sub>4</sub>                                 | -         | 331.2               | <b>213.1</b> /257.2            | 30/14           | 32/22   | 20/25           |
| GA <sub>7</sub>                                 | -         | 329.3               | <b>223.2</b> /--               | 21/--           | 17/--   | 22/--           |
| GA <sub>9</sub>                                 | -         | 315.3               | <b>253.2</b> /271.0            | 22/24           | 27/20   | 25/27           |
| GA <sub>20</sub>                                | -         | 331.2               | <b>287.3</b> /225.2            | 29/16           | 21/26   | 18/21           |
| ABA                                             | -         | 263.2               | <b>153.1</b> /--               | 15/--           | 10/--   | 29/--           |
| IAA                                             | +         | 176.1               | <b>130.1</b> /103.2            | -20/-20         | -15/-33 | -24/-19         |
| JA                                              | -         | 209.2               | <b>59.3</b> /--                | 17/--           | 16/--   | 19/--           |
| IBA                                             | -         | 202.1               | <b>62.25</b> /--               | 14/--           | 11/--   | 23/--           |
| [ <sup>2</sup> H <sub>2</sub> ] GA <sub>1</sub> | -         | 349.3               | <b>231.2</b> /275.1            | 16/16           | 29/25   | 14/26           |
| [ <sup>2</sup> H <sub>2</sub> ] GA <sub>3</sub> | -         | 347.3               | <b>143.2</b> /--               | 16/--           | 27/--   | 26/--           |
| [ <sup>2</sup> H <sub>2</sub> ] GA <sub>4</sub> | -         | 333.3               | <b>215.2</b> /259.3            | 15/15           | 31/22   | 21/16           |
| [ <sup>2</sup> H <sub>6</sub> ] ABA             | -         | 269.2               | <b>159.1</b> /--               | 15/--           | 10/--   | 29/--           |
| [ <sup>2</sup> H <sub>5</sub> ] IAA             | -         | 179.0               | <b>159.8</b> /--               | 18/--           | 25/--   | 24/--           |

21 <sup>a</sup> The product ions in bold were used for quantification.

### 23 **Synthesis of BTA**

24 BTA was synthesized according to a previously reported method.<sup>1</sup> Briefly, bromine (41.2  
25 mL) was added dropwise to a solution containing acetone (25 mL) and methanol (300 mL)  
26 while stirring continuously in a water bath (25 °C). After all of the bromine was added, the  
27 reaction mixture was stirred for another 2 h and then transferred to a fridge and kept at -18 °C  
28 overnight. The crystal precipitate was collected via vacuum filtration. Next, the precipitate (12  
29 g) was added into water (500 mL), and then 95% concentrated sulfuric acid (5 mL) was  
30 slowly added. The reaction mixture was stirred for 48 h at 60 °C in a water bath. When the  
31 solution was cooled down to the room temperature, dichloromethane (3 × 200 mL) was used  
32 to extract. The organic extracts were combined, washed with saturated brine and dried over  
33 anhydrous magnesium sulfate (MgSO<sub>4</sub>). Subsequently, the organic solvent was removed by  
34 evaporation under reduced pressure in a bath kept below 35 °C, and a light yellow liquid  
35 consisting of 1,3-dibromoacetone was left. Finally, TMA (0.23 mL, 0.001 mol) was dissolved  
36 in 4 mL toluene, and then was added dropwise during 3 h to the solution of 1,3-  
37 dibromoacetone (2.16 g, 0.01 mol) in toluene (2 mL) stirring constantly at 0 °C. The  
38 precipitate was collected via vacuum filtration and dissolved in absolute ethanol (1 mL) and  
39 then re-precipitated with isopropyl ether (5 mL). The light yellow product was filtered off and  
40 dried in vacuum desiccator over P<sub>2</sub>O<sub>5</sub>.

### 41 **Preparation of TiO<sub>2</sub>/MHMSS**

42 TiO<sub>2</sub>/magnetic hollow mesoporous silica sphere (MHMSS) was prepared according to  
43 our previous work with slight modification.<sup>2</sup> Firstly, the hollow mesoporous silica spheres  
44 (HMSS) were synthesized. Briefly, CTAB (19.6 g) was dissolved in water (337 mL). Then,

45 with the addition of solid  $\text{Na}_2\text{SiO}_3 \cdot 9\text{H}_2\text{O}$  (23.2 g), a clear solution was formed under stirring  
46 at 30 °C till the  $\text{Na}_2\text{SiO}_3 \cdot 9\text{H}_2\text{O}$  was dissolved. Subsequently, ethyl acetate (35 mL) was added.  
47 The mixture was stirred vigorously for 30 seconds followed by standing at 30 °C for 5 hours.  
48 Then, the mixture was aged at 90 °C for 48 hours. Finally, the product was filtered and  
49 washed with ethanol for several times. The filtered HMSS was dried in a vacuum oven and  
50 calcined at 550 °C for 5 hours. Then magnetic nanoparticles were introduced into the hollow  
51 core of HMSS via a vacuum impregnation of  $\text{Fe}(\text{NO}_3)_3$ . HMSS (2.4 g) was dispersed in  
52  $\text{Fe}(\text{NO}_3)_3 \cdot 9\text{H}_2\text{O}$  aqueous solution (24 g/L, 200 mL). The suspension was heated by  
53 microwave oven till boiling. Then the  $\text{Fe}^{3+}$  entered into the hollow core of HMSS when the  
54 suspension was cooled in ice water mixture. The process was repeated for several times until  
55 water totally dried up. Afterward, the product was rinsed with ethanol (10 mL) twice and  
56 dried again. The product was impregnated in ethylene glycol (1 mL) up to incipient wetness.  
57 The impregnated sample was then heated under nitrogen at 450 °C for 2 hours. Finally,  $\text{TiO}_2$   
58 was loaded onto the obtained MHMSS by liquid phase deposition method. MHMSS (2.0 g)  
59 was added into a solution (200 mL) of 0.1 M  $(\text{NH}_4)_2\text{TiF}_6$  and 0.3 M  $\text{H}_3\text{BO}_3$  in a PTFE  
60 container. The mixture was heated at 35 °C for 12 h under continuous shaking after kept  
61 under vacuum condition for 1 h. The resulting composite was washed with water thoroughly  
62 and dried in a vacuum oven at 60 °C for 6 h. At last, the harvested products were subjected to  
63 heat treatment under nitrogen up to a treatment of 300 °C at the rate of 1 K/min and kept at  
64 this temperature for 2 h. The final products were collected for further use.

65

66 **References**

- 67 1. Y. Q. Huang, G. D. Ruan, J. Q. Liu, Q. Gao, Y. Q. Feng, *Anal. Biochem.*, 2011, **416**, 159-  
68 166.
- 69 2. J. H. Wu, X. S. Li, Y. Zhao, Q. Gao, L. Guo, Y. Q. Feng, *Chem. Commun.*, 2010, **46**,  
70 9031.
- 71
- 72
